1 **A Sanger-based approach for scaling up screening of SARS-CoV-2 variants of interest and**  
2 **concern**

3 Matheus Filgueira Bezerra<sup>1</sup>, Lais Ceschini Machado<sup>2</sup>, Viviane do Carmo Vasconcelos de  
4 Carvalho<sup>3</sup>, Cássia Docena<sup>3</sup>, Sinval Pinto Brandão-Filho<sup>4</sup>, Constância Flávia Junqueira Ayres<sup>2</sup>,  
5 Marcelo Henrique Santos Paiva<sup>2,5\*</sup>, Gabriel Luz Wallau<sup>2\*</sup>.

6 <sup>1</sup>Departamento de Microbiologia – Instituto Aggeu Magalhães; Fiocruz. Recife, PE, Brazil;

7 <sup>2</sup>Departamento de Entomologia e Núcleo de Bioinformática – Instituto Aggeu Magalhães;  
8 Fiocruz. Recife, PE, Brazil;

9 <sup>3</sup>Núcleo de Plataforma Tecnológica – Instituto Aggeu Magalhães; Fiocruz. Recife, PE, Brazil;

10 <sup>4</sup>Departamento de Parasitologia, Instituto Aggeu Magalhães; Fiocruz. Recife, PE, Brazil;

11 <sup>5</sup>Centro Acadêmico do Agreste, Núcleo de Ciências da Vida. Universidade Federal de  
12 Pernambuco, Caruaru, PE, Brazil.

13

14 **Running title:** Identification of SARS CoV-2 variants with Sanger sequencing

15

16 \* Corresponding authors: Marcelo Paiva & Gabriel Wallau

17 Av. Professor Moraes Rego, s/n, Recife/PE 50740-465, Brazil. Tel: +55-81-21012634.

18 Contact: [marcelo.paiva@fiocruz.br](mailto:marcelo.paiva@fiocruz.br) / [gabriel.wallau@fiocruz.br](mailto:gabriel.wallau@fiocruz.br)

19 **ABSTRACT**

20           The global spread of new SARS-CoV-2 variants of concern underscore an urgent need of  
21 simple deployed molecular tools that can differentiate these lineages. Several tools and protocols  
22 have been shared since the beginning of the COVID-19 pandemic, but they need to be timely  
23 adapted to cope with SARS-CoV-2 evolution. Although whole-genome sequencing (WGS) of  
24 the virus genetic material have been widely used, it still presents practical difficulties such as  
25 high cost, shortage of available reagents in the global market, need of a specialized laboratorial  
26 infrastructure and well-trained staff. These limitations result in genomic surveillance blackouts  
27 across several countries. Here we propose a rapid and accessible protocol based on Sanger  
28 sequencing of a single PCR fragment that is able to identify and discriminate all SARS-CoV-2  
29 variants of concern (VOCs) identified so far, according to each characteristic mutational profile  
30 at the Spike-RBD region (K417N/T, E484K, N501Y, A570D). Twelve COVID-19 samples from  
31 Brazilian patients were evaluated for both WGS and Sanger sequencing: three from P.2, two  
32 from P.1 and seven from B.1.1 lineage. All results from the Sanger sequencing method perfectly  
33 matched the mutational profile of VOCs and non-VOCs described by WGS. In summary, this  
34 approach allows a much broader network of laboratories to perform molecular surveillance of  
35 SARS-CoV-2 VOCs and report results within a shorter time frame, which is of utmost  
36 importance in the context of rapid public health decisions in a fast evolving worldwide  
37 pandemic.

38 **Keywords:** SARS-CoV-2 variants of concern; Sanger sequencing; molecular surveillance.

39

40

41 As of December 2020, the United Kingdom reported a new SARS-CoV-2 variant, the  
42 B.1.1.7 lineage, which presented a higher transmissibility rate, bringing deep concerns about the  
43 prospects of the COVID-19 pandemic (1). Shortly after, other so-called “Variants Of Concern”  
44 (VOCs) were reported in South Africa (B.1.3.51), Brazil (P.1) and more recently, in the U.S.A  
45 (B.1.526) (2-4). Specific mutations, such as the N501Y and the E484K, in the residue binding  
46 domain (RBD) of the Spike protein are recurrent across the VOCs. These mutations play an  
47 important role on the lineage phenotype, allowing higher affinity to the human ACE2 receptor  
48 and/or immune evasion from previously elicited antibodies (5,6). It is likely that continuous  
49 circulation of SARS-CoV-2 in previously exposed and vaccinee populations will drive SARS-  
50 CoV-2 evolution towards lineages with increased transmissibility and escape from immune  
51 responses, allowing these variants to spread quickly throughout the world (6,7). In this scenario,  
52 the development of large-scale molecular surveillance strategies to monitor SARS-CoV-2 VOCs  
53 is crucial to provide timely information for proper public health control and adaptation of  
54 vaccination measures.

55 Since the release of the first SARS-CoV-2 genome, many molecular tools have been  
56 adapted to detect and monitor this virus in parallel with its emerging genomic changes (8). One  
57 of the most employed tools, capable of yielding unprecedented results is the whole genome  
58 sequencing (WGS) of SARS-CoV-2 from clinical samples. However, WGS is still very  
59 expensive to be applied as a front-line method for massive testing, particularly in  
60 underdeveloped and developing countries. Additionally, other PCR-based methodologies have  
61 been developed as well, focusing mainly on lineage-specific deletions of emerging VOCs and/or  
62 Spike mutation differentiation based on amplification dropouts and specific probes in RT-PCR  
63 assays (9,10). However, worldwide shortage of imported reagents, limited laboratorial

64 infrastructure and the need of well-trained staff are other limitations commonly faced by these  
65 molecular protocols, resulting in surveillance blackouts in many countries. To illustrate the large  
66 discrepancies in genomic surveillance data observed during the Covid-19 pandemic, whilst 6.5%  
67 ( $270,762/4.1 \times 10^6$ ) of the UK confirmed cases had their genomes sequenced, only 0.03%  
68 ( $3,430/10.5 \times 10^6$ ) of the Brazilian confirmed cases were sequenced by early March (11).  
69 Therefore, the establishment and standardization of as many molecular protocols as possible that  
70 help to scale up the SARS-CoV-2 VOCs screening is highly desirable. Here we propose a rapid  
71 and accessible protocol based on Sanger sequencing that is able to identify and discriminate  
72 SARS-CoV-2 VOCs, according to each characteristic mutational profile at the Spike-RBD  
73 region.

74 In order to access whether the amplicon used in this study is able to cover key SARS-  
75 CoV-2 mutations, we accessed Twelve COVID-19 positive samples (RT-PCR - Ct values below  
76 25) derived from symptomatic patients of both Pernambuco (Northeast Brazil) and Amazonas  
77 (North Brazil) states that had been previously genomic sequenced (8). The study was approved  
78 by the local Ethical Committee (CAAE32333120.4.0000.5190). RNA extractions were  
79 performed in a BSL-3 facility laboratory with a robotic platform using the Maxwell® 16 Viral  
80 Total Nucleic Acid Purification Kit (Promega, Wisconsin-USA), following the manufacturer's  
81 instructions. The molecular diagnosis of SARS-CoV-2 was performed using the Kit Molecular  
82 BioManguinhos SARS-CoV-2 (E/RP).

83 High Capacity cDNA Reverse-Transcription kit (Applied Biosystems) was used for  
84 reverse transcription, following the manufacturer's instruction. Next, cDNA was subjected to  
85 PCR with Platinum Taq-polymerase (Invitrogen) and primers flanking the regions between the  
86 nucleotide positions 22797 and 23522 of the Wuhan (Wu-1) reference genome, covering key

87 amino acid replacements commonly found in VOCs RBD domain of the Spike protein (76 Left:  
88 5'-AGGGCAAACACTGGAAAGATTGCT-3' and 77 Right: 5'-  
89 CAGCCCCTATTAACAGCCTGC-3' designed by [https://www.protocols.io/view/ncov-2019-  
90 sequencing-protocol-bbmuik6w](https://www.protocols.io/view/ncov-2019-sequencing-protocol-bbmuik6w)). PCR conditions were: 98 °C for 5 minutes s, 98°C for 30  
91 seconds, 59°C for 30 seconds and 72°C for 45 seconds during 35 cycles and final extension of 5  
92 min at 72°C. Primer and magnesium chloride concentrations in the PCR were 0.2 µM and 1 mM,  
93 respectively. Amplified PCR products were verified in a 1.5% Agarose gel stained with Sybr  
94 Safe (Sigma-Aldrich), quantified in a NanoDrop OneC Microvolume UV-Vis Spectrophotometer  
95 (Thermo-Fischer, USA) and diluted to 30 ng/uL. Sequencing reactions were performed with  
96 BigDye Terminator v3.1 (Applied Biosystems) and ran in capillary electrophoresis (ABI 3500,  
97 Applied Biosystems). Contigs from forward and reverse strands were built and analyzed using  
98 the CodonCode aligner v3.7.1 software and figures were built using the Biorender platform.  
99 Samples were assigned to a lineage according to the mutational profile (Table 1).

100 According to the WGS, from the twelve COVID-19 samples evaluated, seven were from  
101 the B.1.1 lineage (non-VOC), three were P.2 and two were P.1. Remarkably, in a blind  
102 comparison to WGS (gold standard), all results from the Sanger sequencing method matched  
103 those from WGS method. The K417, E484 and N501Y mutations were identified in the P.1 cases  
104 and the E484K (in absence of the others) in the P.2 cases (Table 1).

105 Within the sequencing of a single 725 base pairs PCR fragment (Figure 1), this approach  
106 could successfully detect VOC-associated mutations and correctly classify samples according to  
107 the WGS data. Moreover, the flanked region also covers other relevant circulating RBD  
108 mutations (Figure 1) and potentially, new mutations that have not been identified yet. Together,  
109 these features overcome some of the limitations of allelic-specific PCR methods, such as the

110 need of one specific probe or primer for each mutation to be evaluated and previous knowledge  
111 of the circulating mutations (10). Furthermore, high-quality electropherograms were obtained  
112 without a PCR purification step, reducing costs and time of sample processing, which is  
113 particularly useful for large-scale application of the method. Another advantage of this approach  
114 is that primers can be easily adjusted without major protocol modifications, in case newly  
115 described mutations need to be detected. On the other hand, it is important to highlight that  
116 Sanger sequencing is normally more time consuming than allelic-specific RT-PCR and hence  
117 with a comparative reduced scaling capacity, but it brings some advantages such as more genetic  
118 data that helps to tease apart different VOCs and the possibility of detecting new emerging RBD  
119 mutations.

120         It is important to highlight that this approach does not substitute WGS and other PCR-  
121 based assays and could be used in combination to further validate the VOCs results mainly with  
122 WGS to uncover other important mutation at the SAR-CoV-2 genome, but it will allow a much  
123 broader network of laboratories to perform molecular surveillance of SARS-CoV-2 VOCs,  
124 reporting results within a shorter time frame and in larger amounts, which is of utmost  
125 importance in the context of rapid public health decisions in a fast evolving worldwide  
126 pandemic.

127

## 128 **ACKNOWLEDGMENTS**

129         We would like to thank the COVID-IAM and LACEN-PE teams for providing the  
130 samples to sequence the SARS-CoV-2 genomes, the Technological Platform Core and the

131 Bioinformatic Core of the Aggeu Magalhaes Institute for the support with their research  
132 facilities.

133

#### 134 **DATA AVAIABILITY**

135 All genomes generated in this study are deposited on GISAID under the accessions:  
136 EPI\_ISL\_500460, EPI\_ISL\_500461, EPI\_ISL\_500865, EPI\_ISL\_500868, EPI\_ISL\_500872,  
137 EPI\_ISL\_500477, EPI\_ISL\_500482, EPI\_ISL\_1239012, EPI\_ISL\_1239013, EPI\_ISL\_1239014,  
138 EPI\_ISL\_1239015, EPI\_ISL\_1239016.

139

#### 140 **FUNDING**

141 Gabriel Luz Wallau was supported by the National Council for Scientific and  
142 Technological Development by the productivity research fellowship level 2 (303902/2019-1).

143

#### 144 **DISCLOSURE OF CONFLICTS OF INTEREST**

145 The authors have no competing financial interests to declare.

146

#### 147 **AUTHOR CONTRIBUTIONS**

148 M.F.B conceived the study, performed experiments, collected/analyzed data and drafted the  
149 manuscript. L.C.M, V.C.V.C and C.D performed experiments. S.P.B.F and C.F.J.A obtained  
150 patient samples, updated the clinical data and corrected the manuscript. M.H.S.P and G.L.W  
151 conceived and designed the study, analyzed data and gave the final approval of the version to be  
152 submitted.

153

## 154 REFERENCES

- 155 1. Leung K, Shum MH, Leung GM, Lam TT, Wu JT. Early transmissibility assessment of  
156 the N501Y mutant strains of SARS-CoV-2 in the United Kingdom, October to November  
157 2020. *Euro Surveill.* 2021; 26(1): 2002106.
- 158 2. Makoni M. South Africa responds to the new SARS-CoV-2 variant. *The Lancet.* 2021;  
159 397(10271): 261.
- 160 3. Faria NR, Mellan TA, Whittaker C, Claro IM, Candido DDS, Mishra S, Crispim MAE.  
161 Genomics and epidemiology of a novel SARS-CoV-2 lineage in Manaus, Brazil.  
162 *medRxiv [Preprint].* 2021; 3:2021.02.26.21252554.
- 163 4. Annavajhala MK, Mohri H, Zucker JE, et al. A Novel SARS-CoV-2 Variant of Concern,  
164 B.1.526, Identified in New York. *Preprint. medRxiv [Preprint].* 2021;  
165 2021.02.23.21252259.
- 166 5. Wang P, Wang M, Yu J, et al. Increased Resistance of SARS-CoV-2 Variant P.1 to  
167 Antibody Neutralization. *BioRxiv [Preprint].* 2021; 2021;2021.03.01.433466.
- 168 6. Nelson G, Buzko O, Spilman P, Niazi K, Rabizadeh S, Soon-Shiong P. Molecular  
169 dynamic simulation reveals E484K mutation enhances spike RBD-ACE2 affinity and the



170 combination of E484K, K417N and N501Y mutations (501Y.V2 variant) induces  
171 conformational change greater than N501Y mutant alone, potentially resulting in an  
172 escape mutant. G bioRxiv [Preprint]. 2021; 2021.01.13.426558.

173 7. Fontanet A, Autran B, Lina B, Kieny M, Karim S, Sridhar D. SARS-CoV-2 variants and  
174 ending the COVID-19 pandemic.. The Lancet. 2021; 397(10278): 952-954.

175 8. Paiva MHS, Guedes DRD, Docena C, Bezerra MF, Dezordi FZ, Machado LC,  
176 Krokovsky L, Helvecio E. Multiple Introductions Followed by Ongoing Community  
177 Spread of SARS-CoV-2 at One of the Largest Metropolitan Areas of Northeast Brazil.  
178 Viruses. 2020; 12(12):1414.

179 9. Chantal B.F. Vogels, Mallery Breban, Tara Alpert1 , Mary E. Petrone, Anne E. Watkins,  
180 Emma B. Hodcroft, Christopher E. Mason. PCR assay to enhance global surveillance for  
181 SARS-CoV-2 variants of concern. MedRxiv [Preprint]. 2021;  
182 <https://doi.org/10.1101/2021.01.28.21250486>.

183 10. Naveca F, Nascimento V, Souza V., et al. COVID-19 epidemic in the Brazilian state of  
184 Amazonas was driven by long-term persistence of endemic SARS-CoV-2 lineages and  
185 the recent emergence of the new Variant of Concern P.1. Research Square [Preprint].  
186 2021; <https://doi.org/10.21203/rs.3.rs-275494/v1>.

187 11. GISAID initiative, accessed on 2021 March 02; Available from: <http://www.gisaid.org/>

188

## 189 **FIGURE LEGENDS**

190 **Figure 1. Identification of Sars CoV-2 Spike-RBD mutations using Sanger sequencing.**

191 Commonly found RBD mutations flanked by the primer set (nucleotide positions from 22797 to

192 23522 at the Wu-1 genome) used for sequencing, including key mutations to enable identifying  
193 variants of concern and interest **(A)**. 725 bp PCR fragments amplified from Sars Cov-2 cDNA  
194 **(B)**. Sections from the eletropherograms obtained by Sanger sequencing showing the E484K and  
195 N501Y VOC-associated mutations **(C)**.

196

**Table 1. Sars cov-2 lineages according to the mutational profile in Sanger sequencing.**

| Lineage         | First report       | Mutation |         |         |         |         |         |         |
|-----------------|--------------------|----------|---------|---------|---------|---------|---------|---------|
|                 |                    | K417N    | K417T   | L452R   | S477N   | E484K   | N501Y   | A570    |
| <b>P.1</b>      | Brazil (Amazon)    | -        | present | -       | -       | present | present | -       |
| <b>P.2</b>      | Brazil             | -        | -       | -       | -       | present | -       | -       |
| <b>B1.1.7</b>   | U.K                | -        | -       | -       | -       | -       | present | present |
| <b>B.1.3.51</b> | South Africa       | present  | -       | -       | -       | present | present | -       |
| <b>CAL.20C</b>  | U.S.A (California) | -        | -       | present | -       | -       | -       | -       |
| <b>B.1.526</b>  | U.S.A (New York)   | -        | -       | -       | present | present | -       | -       |

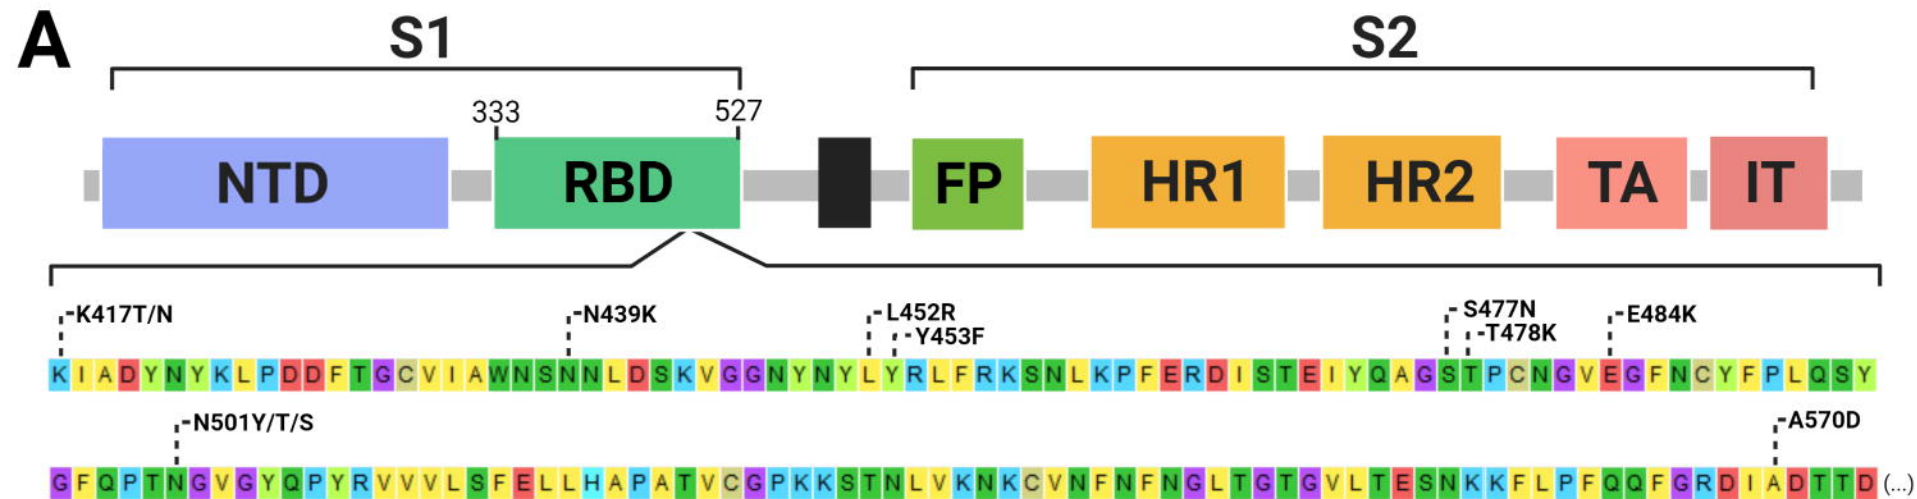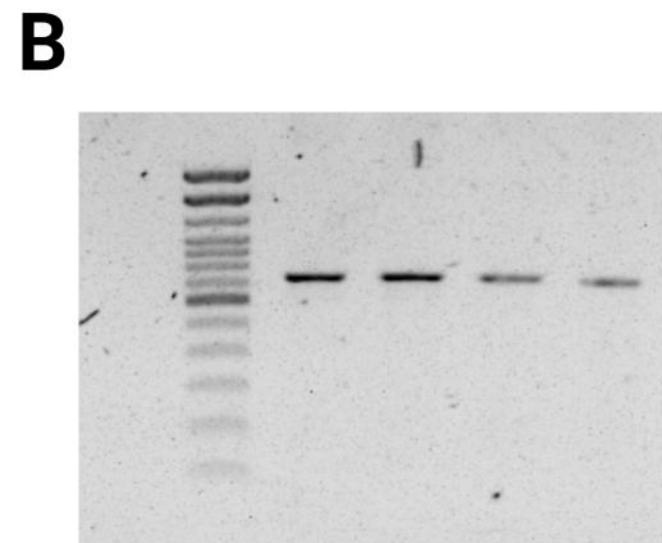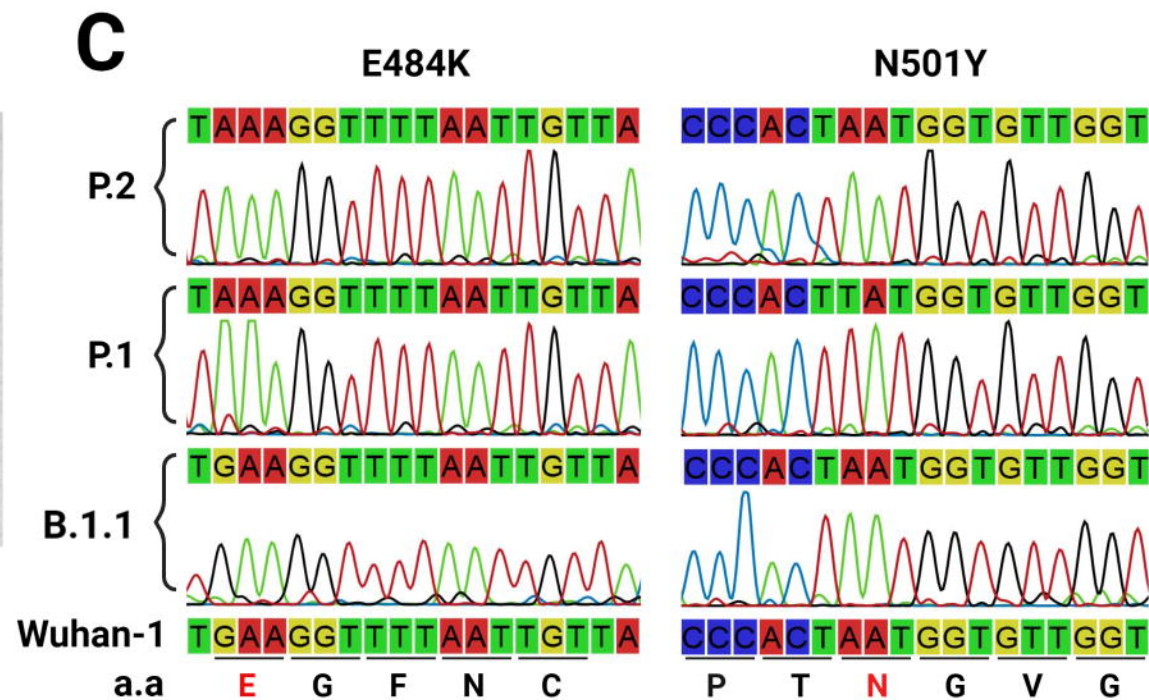

Source: https://www.medrxiv.org/content/medrxiv/early/2021/03/25/2021.03.20.21253956.full.pdf
